# Supplementary material for: The transferability of lipid loci across African, Asian and European cohorts
Source: bioRxiv or medRxiv preprint supplement (doi:10.1101/525170), 2019-03-11
Supplement: Supplementary file [file media-1.pdf]

## Supplementary figures and tables

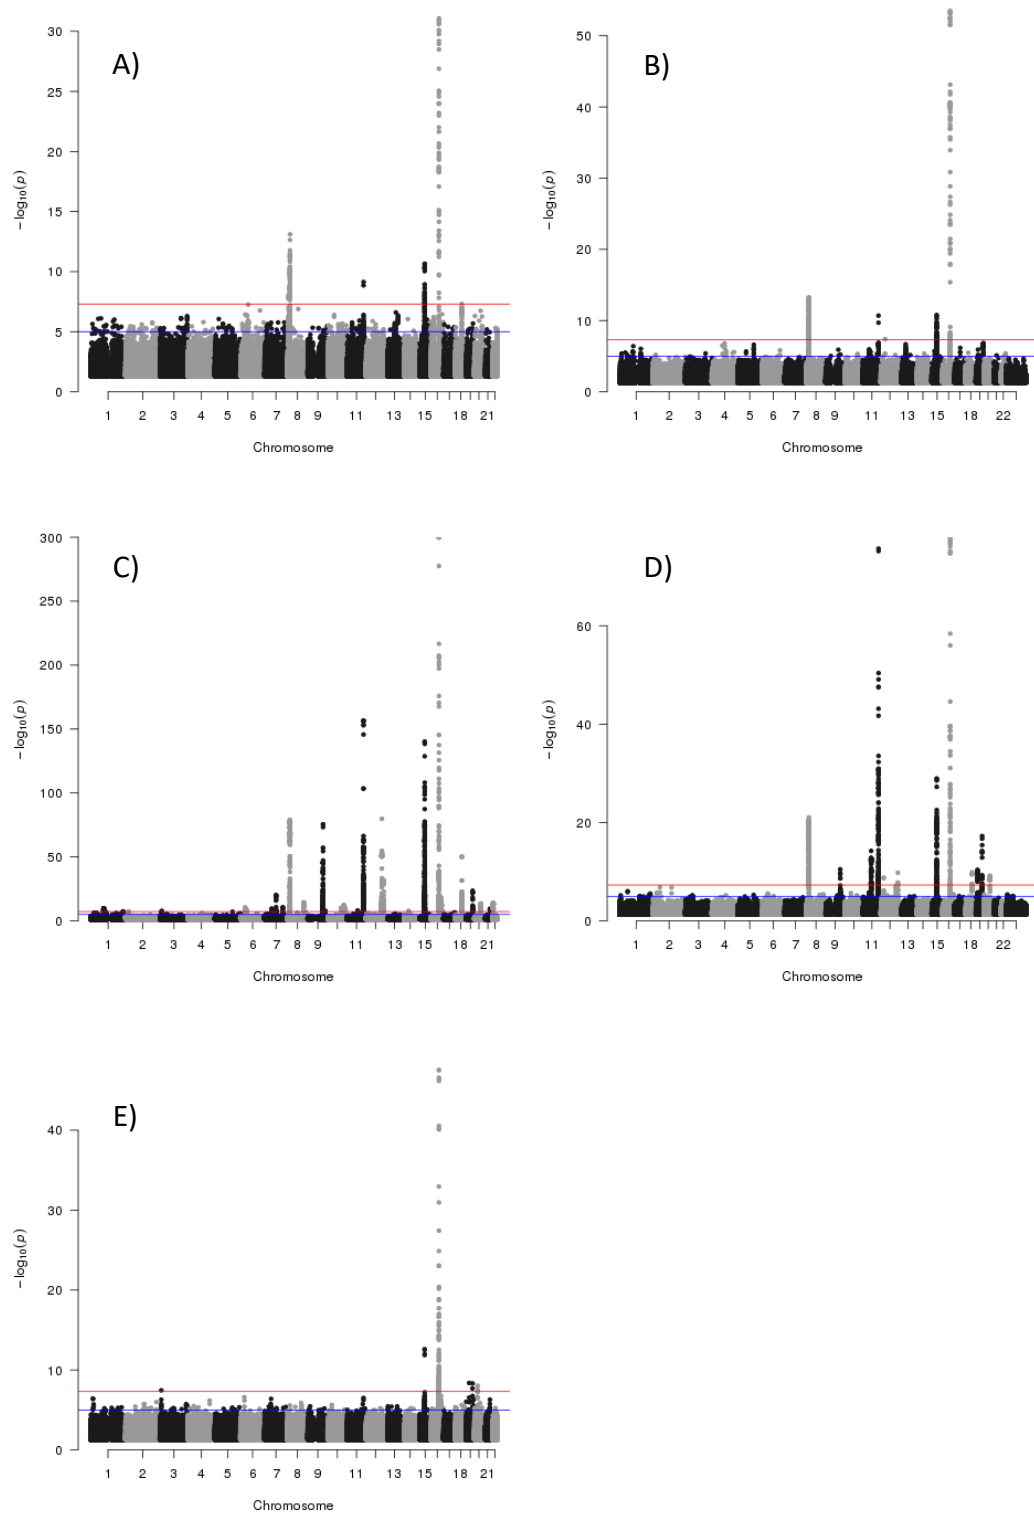

**Supplementary Figure 1: Manhattan plot** for SNP associations with HDL cholesterol levels, for A) eMerge, B) UKHLS, C) Biobank Japan, D) China Kadoorie Biobank, E) APCDR-Uganda

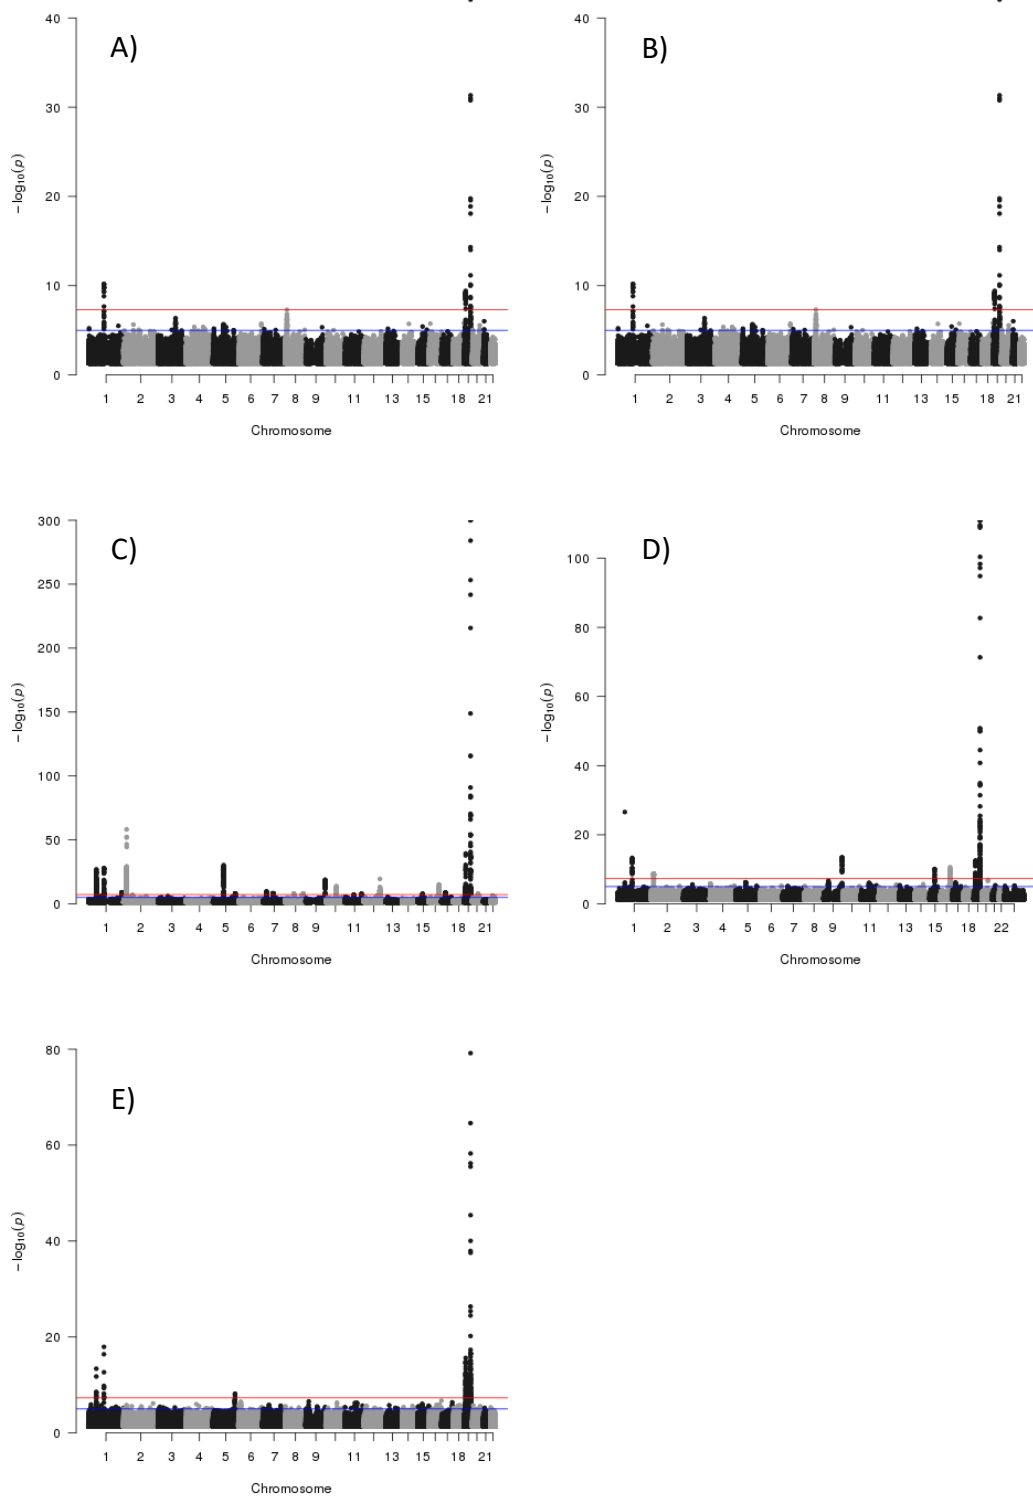

**Supplementary Figure 2: Manhattan plot** for SNP associations with LDL cholesterol levels, for A) eMerge, B) UKHLS, C) Biobank Japan, D) China Kadoorie Biobank, E) APCDR-Uganda

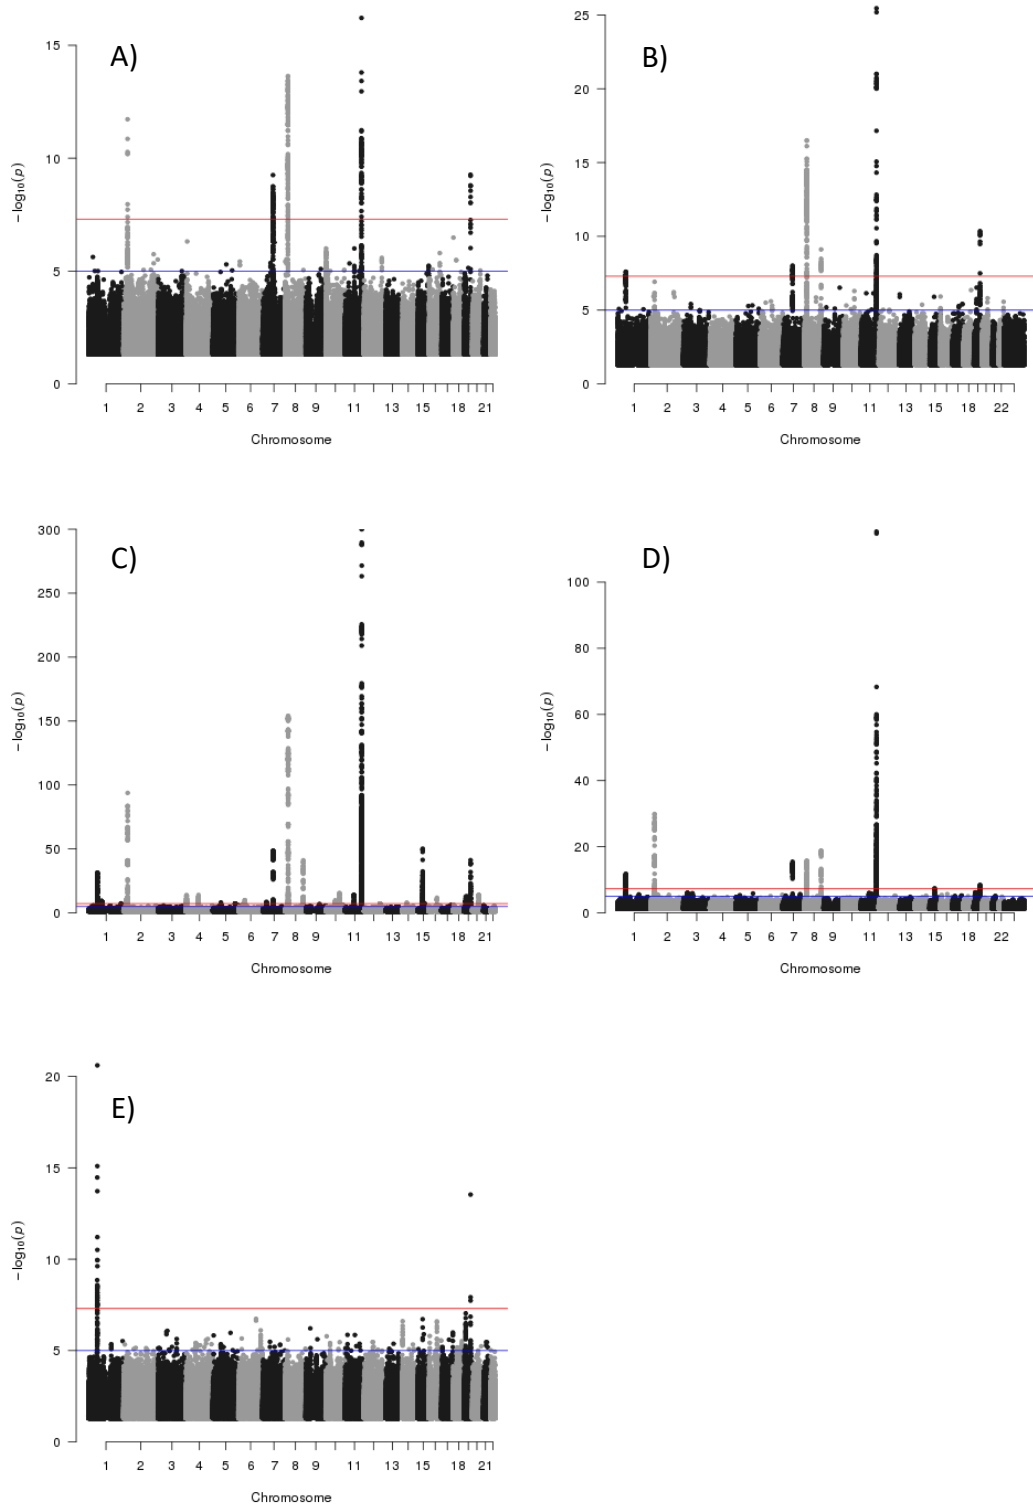

**Supplementary Figure 3: Manhattan plot** for SNP associations with triglyceride levels, for A) eMerge, B) UKHLS, C) Biobank Japan, D) China Kadoorie Biobank, E) APCDR-Uganda

**Supplementary Table 1: Trans-ethnic genetic correlation** estimates and p-values for a test whether the genetic correlation is 1 for each lipid biomarker in one study with each lipid biomarkers in the other study

| <b>biomarker</b>                                    | <b>correlation</b> | <b>standard error</b> | <b>p-value*</b> |
|-----------------------------------------------------|--------------------|-----------------------|-----------------|
| <b>GLGC2013 (European) – China Kadoorie Biobank</b> |                    |                       |                 |
| HDL-HDL                                             | 0.999              | -                     | -               |
| LDL-LDL                                             | 0.778              | 0.300                 | 0.460           |
| TG-TG                                               | 0.999              | -                     | -               |
| HDL - LDL                                           | 0.068              | 0.229                 | 0.000           |
| HDL - TG                                            | -0.550             | 0.176                 | 0.000           |
| LDL - HDL                                           | -0.238             | 0.143                 | 0.000           |
| LDL - TG                                            | 0.473              | 0.155                 | 0.001           |
| TG - HDL                                            | -0.741             | 0.162                 | 0.000           |
| TG - LDL                                            | -0.226             | 0.195                 | 0.000           |
| <b>GLGC2013 (European) – Biobank Japan</b>          |                    |                       |                 |
| HDL-HDL                                             | 0.999              | 0.081                 | 0.999           |
| LDL-LDL                                             | 0.959              | 0.138                 | 0.765           |
| TG-TG                                               | 0.961              | 0.066                 | 0.555           |
| HDL - LDL                                           | -0.055             | 0.097                 | 0.000           |
| HDL - TG                                            | -0.592             | 0.130                 | 0.000           |
| LDL - HDL                                           | -0.277             | 0.150                 | 0.000           |
| LDL - TG                                            | 0.294              | 0.056                 | 0.000           |
| TG - HDL                                            | -0.481             | 0.176                 | 0.000           |
| TG - LDL                                            | -0.038             | 0.091                 | 0.000           |
| <b>China Kadoorie Biobank – Biobank Japan</b>       |                    |                       |                 |
| HDL-HDL                                             | 0.999              | -                     | -               |
| LDL-LDL                                             | 0.871              | 0.225                 | 0.566           |
| TG-TG                                               | 0.999              | -                     | -               |
| HDL - LDL                                           | 0.085              | 0.141                 | 0.000           |
| HDL - TG                                            | -0.618             | 0.151                 | 0.000           |
| LDL - HDL                                           | 0.290              | 0.185                 | 0.000           |
| LDL - TG                                            | 0.180              | 0.169                 | 0.000           |
| TG - HDL                                            | -0.862             | 0.186                 | 0.000           |
| TG - LDL                                            | -0.097             | 0.153                 | 0.000           |

\* When the estimate is close to the boundary of 1, popcorn cannot compute the standard error and p-value

**Supplementary Table 2: Associations of polygenic scores** based on established lipid-associated loci and levels of each of the other lipid biomarkers in UKHLS, HELIC-MANOLIS, -Pomak, and APCDR-Uganda using a linear mixed model analysis.

| <b>score - trait</b> | <b>p-value</b> | <b>correlation</b> | <b>SE (<math>\beta</math>)</b> |
|----------------------|----------------|--------------------|--------------------------------|
| <b>APCDR-Uganda</b>  |                |                    |                                |
| HDL - LDL            | 2.34E-01       | -1.49E-02          | 1.25E-02                       |
| HDL - TG             | 2.49E-01       | -1.44E-02          | 1.25E-02                       |
| LDL - HDL            | 6.75E-10       | -7.73E-02          | 1.25E-02                       |
| LDL - TG             | 7.27E-04       | 4.22E-02           | 1.25E-02                       |
| TG - HDL             | 6.81E-01       | -5.13E-03          | 1.25E-02                       |
| TG - LDL             | 1.86E-04       | -4.67E-02          | 1.25E-02                       |
| <b>UKHLS</b>         |                |                    |                                |
| HDL - LDL            | 2.02E-07       | -5.26E-02          | 1.01E-02                       |
| HDL - TG             | 1.63E-12       | -7.20E-02          | 1.02E-02                       |
| LDL - HDL            | 3.97E-07       | -5.16E-02          | 1.01E-02                       |
| LDL - TG             | 4.07E-01       | 8.45E-03           | 1.02E-02                       |
| TG - HDL             | 1.67E-39       | -1.34E-01          | 1.01E-02                       |
| TG - LDL             | 2.47E-01       | 1.17E-02           | 1.01E-02                       |
| <b>HELIC-Pomak</b>   |                |                    |                                |
| HDL - LDL            | 1.97E-02       | -7.22E-02          | 3.09E-02                       |
| HDL - TG             | 4.96E-05       | -1.28E-01          | 3.10E-02                       |
| LDL - HDL            | 6.00E-02       | -6.08E-02          | 3.18E-02                       |
| LDL - TG             | 9.18E-01       | 3.43E-03           | 3.19E-02                       |
| TG - HDL             | 6.16E-07       | -1.57E-01          | 3.05E-02                       |
| TG - LDL             | 1.70E-02       | 7.39E-02           | 3.08E-02                       |
| <b>HELIC-MANOLIS</b> |                |                    |                                |
| HDL - LDL            | 7.56E-01       | 9.19E-03           | 2.96E-02                       |
| HDL - TG             | 2.13E-03       | -9.36E-02          | 3.01E-02                       |
| LDL - HDL            | 4.42E-01       | -2.29E-02          | 2.97E-02                       |
| LDL - TG             | 9.64E-01       | -1.36E-03          | 3.03E-02                       |
| TG - HDL             | 1.25E-05       | -1.33E-01          | 2.98E-02                       |
| TG - LDL             | 9.56E-01       | -1.63E-03          | 2.98E-02                       |

**Supplementary Table 3: Study description** and mean levels of HDL-cholesterol, LDL-cholesterol and triglycerides (TG) in mmol/l

| study                                                                  | acronym                         | population                 | array                                 | N SNPs genotyped, imputed | N samples    | %female | mean age | mean HDL   | mean LDL   | mean TG    |
|------------------------------------------------------------------------|---------------------------------|----------------------------|---------------------------------------|---------------------------|--------------|---------|----------|------------|------------|------------|
| UK Household Longitudinal Study <sup>1</sup>                           | <b>UKHLS</b>                    | British                    | HumanCoreExome                        | 248K, 26M                 | 9,962        | 44      | 52       | 1.55       | 3.02       | 1.81       |
| electronic MEdical Records and GEnomics <sup>2</sup>                   | <b>eMERGE</b>                   | European ancestry          | GWAS arrays, Metabochip               | 17.6M                     | 14,528       | 43      | 61       | 1.33       | 2.80       | 1.77       |
| Global Lipids Genetics Consortium <sup>3</sup>                         | <b>GLGC2013</b> (meta-analysis) | European ancestry          | 23 studies GWAS arrays, 37 Metabochip | 200K, 2.5M                | 188,577      |         |          |            |            |            |
| Global Lipids Genetics Consortium <sup>4</sup>                         | <b>GLGC2017</b> (meta-analysis) | European ancestry          | HumanExome                            | 242,289                   | 237,050      |         |          |            |            |            |
| African Partnership for Chronic Disease Research - Uganda <sup>5</sup> | <b>APCDR-Uganda</b>             | Ugandan                    | HumanOmni2.5                          | 2.2M, 20M                 | 6,407        | 56      | 34       | 1.02       | 2.05       | 1.18       |
| China Kadoorie Biobank <sup>6</sup>                                    | <b>CKB</b>                      | Chinese                    | Custom Affymetrix Axiom Array         | 701K/830K, 10M            | 21,295       | 62      | 60       | 1.37       | 2.19       | 1.69       |
| RIKEN Biobank Japan <sup>7</sup>                                       | <b>BBJ</b>                      | Japanese                   | HumanOmniExpress                      | 6M                        | 162,255      | 63      | 43       | 1.42       | 3.38       | 1.50       |
| Hellenic Isolated Cohorts <sup>8,9</sup>                               | <b>HELIC-MANOLIS, -Pomak</b>    | Isolated Greek populations | Whole-genome sequencing               | 24M                       | 1,641, 1,945 | 42,34   | 62,45    | 1.28, 1.18 | 3.27, 3.09 | 1.61, 1.58 |

## Study references

1. Prins, B. P. *et al.* Genome-wide analysis of health-related biomarkers in the UK Household Longitudinal Study reveals novel associations. *Sci. Rep.* **7**, 11008 (2017).
2. Verma, S. S. *et al.* Imputation and quality control steps for combining multiple genome-wide datasets. *Front. Genet.* **5**, (2014).
3. Global Lipids Genetics Consortium. Discovery and refinement of loci associated with lipid levels. *Nat. Genet.* **45**, 1274–1283 (2013).
4. Liu, D. J. *et al.* Exome-wide association study of plasma lipids in >300,000 individuals. *Nat. Genet.* **49**, 1758 (2017).
5. Heckerman, D. *et al.* Linear mixed model for heritability estimation that explicitly addresses environmental variation. *Proc. Natl. Acad. Sci. U. S. A.* **113**, 7377–7382 (2016).
6. Chen, Z. *et al.* China Kadoorie Biobank of 0.5 million people: survey methods, baseline characteristics and long-term follow-up. *Int. J. Epidemiol.* **40**, 1652–1666 (2011).
7. Kanai, M. *et al.* Genetic analysis of quantitative traits in the Japanese population links cell types to complex human diseases. *Nat. Genet.* **50**, 390–400 (2018).
8. Gilly, A. *et al.* Cohort-wide deep whole genome sequencing and the allelic architecture of complex traits. *Nat. Commun.* **9**, 4674 (2018).
9. Gilly, A. *et al.* Very low depth whole genome sequencing in complex trait association studies. *Bioinforma. Oxf. Engl.* (2018). doi:10.1093/bioinformatics/bty1032
